# Supplementary material for: Human induced pluripotent stem cell-derived mesenchymal stem cells prevent adriamycin nephropathy in mice
Source: PubMed Central journal article supplement (PMC5732756; doi:10.18632/oncotarget.21760), 2017-10-10
Supplement: oncotarget-08-103640-s001.pdf [file oncotarget-08-103640-s001.pdf]

## Human induced pluripotent stem cell-derived mesenchymal stem cells prevent adriamycin nephropathy in mice

### SUPPLEMENTARY MATERIALS

Supplementary Table 1: Primers for real-time PCR and stem cell tracking

| Gene                     | Primers                                                                      |
|--------------------------|------------------------------------------------------------------------------|
| Human Bax                | Forward-5'- TTCTGACGGCAACTTCAACTGG-3'<br>Reverse-5'- AGGAAGTCCAATGTCCAGCC-3' |
| Human Bcl2               | Forward-5'-GATGGGAACACTGGTGGAGGATGG-3'<br>Reverse-5'- TCTGGAGGGCCACGGCAG-3'  |
| Human Survivin           | Forward-5'-CTTGGCCCAGTGTTCCTTCT-3'<br>Reverse-5'-CCTCCAAAGTGCTGGTATT-3'      |
| Human POLR2E             | Forward-5'-GCTCTGGAAAATCCGCAAGA-3'<br>Reverse- 5'-TCCTCCAGGGTCTGGTCAAG-3'    |
| Human FN                 | Forward-5'-CCCAACTGGCATTGACTTTT-3'<br>Reverse-5'- CTCGAGGTCTCCACTGAAG-3'     |
| Human $\beta$ -actin     | Forward-5'-TCCATCATGAAGTGTGACGT-3'<br>Reverse-5'-GAGCAATGATCTTGATCTTCAT-3'   |
| Mouse Bax                | Forward-5'-CCCGAGCTGATCAGAACCAT-3'<br>Reverse -5'-GGGGTCCCGAAGTAGGAGAG-3'    |
| Mouse Bcl2               | Forward-5'- CTTTGAGTTCGGTGGGGTCA-3'<br>Reverse -5'- AGTTCACAAAGGCATCCCA-3'   |
| Mouse Survivin           | Forward-5'-ATCGCCACCTTCAAGAACTG-3'<br>Reverse-5'- GGCCAAATCAGGCTCGTTCT-3'    |
| Mouse/Rat $\alpha$ -SMA  | Forward-5'-CTCCTCAGGACGACAATCGACA-3'<br>Reverse-5'-CCTTCCACAGGGCTTTGTTTG-3'  |
| Mouse collagen IV        | Forward-5'-GGTCCTGTCTGGAAGAGTTT-3'<br>Reverse-5'-AAATACAATGGGAGGGAGAA-3'     |
| Mouse/Rat Shh            | Forward-5'-CAGGGGGTTTGAAAGAGGC-3'<br>Reverse-5'- TTCTCGGCTACGTTGGGGAT-3'     |
| Mouse Ptch2              | Forward-5'- GTCCACCTAGTGCTCCCAAC-3'<br>Reverse-5'- CAGGAAGGTGCTCTGCAAGG-3'   |
| Mouse PCNA               | Forward-5'-GATGCCGTCGGGTGAATTTG-3'<br>Reverse-5'- CCATTGCCAAGCTCTCCA-3'      |
| Mouse Ki67               | Forward-5'-CAGACTTCCACAGAGACAG-3'<br>Reverse-5'-CCTTCATCCAGATTCACAGA-3'      |
| Mouse Gli-1              | Forward-5'-CCTGGTGGCTTTCATCAACT-3'<br>Reverse-5'-ACACAGGGCTGGACTCCATA-3'     |
| Rat Gli-1                | Forward-5'-GTCACTACCTGGCCTCACAC-3'<br>Reverse-5'- CCCCTGCATTGGGGTTGTAT-3'    |
| Mouse/Rat $\beta$ -actin | Forward-5'-TCCATCATGAAGTGTGACGT-3'<br>Reverse-5'-GAGCAATGATCTTGATCTTCAT-3'   |
